# Supplementary material for: The Impact of Retinal Configuration on the Protein-Chromophore Interactions in Bistable Jumping Spider Rhodopsin-1
Source: Preprints.org preprint supplement (doi:10.20944/preprints202111.0282.v1), 2021-11-16
Supplement: Supplementary file 1 [file supplementary]

Archive with 2 entries (2 files):
- Supporting JSR1.pdf
- __MACOSX/._Supporting JSR1.pdf
