# Supplementary material for: The Impact of Retinal Configuration on the Protein-Chromophore Interactions in Bistable Jumping Spider Rhodopsin-1
Source: Preprints.org preprint supplement (doi:10.20944/preprints202111.0282.v1), 2021-11-16
Supplement: Supplementary file 1 [file supplementary › Supporting JSR1.pdf]

## **The Impact of Retinal Configuration on the Protein-Chromophore Interactions in Bistable Jumping Spider Rhodopsin-1**

Jonathan R. Church<sup>†</sup>, Jógvan Magnus Haugaard Olsen<sup>‡</sup> and Igor Schapiro<sup>†,\*</sup>

<sup>†</sup> Fritz Haber Center for Molecular Dynamics Research Institute of Chemistry, The Hebrew University of Jerusalem, Jerusalem 9190401, Israel

<sup>‡</sup> DTU Chemistry, Technical University of Denmark, DK-2800 Kgs. Lyngby, Denmark.

\* *Corresponding author:* [Igor.Schapiro@mail.huji.ac.il](mailto:Igor.Schapiro@mail.huji.ac.il)

## Table of Contents

|                                                                                     |   |
|-------------------------------------------------------------------------------------|---|
| Equilibration and Production .....                                                  | 1 |
| Table S1. Constraints (kcal/mol) used during each step of dynamics with Amber. .... | 1 |

## Equilibration and Production

As mentioned in the main text the crystal structure of JSR1 (PDB ID: 6I9K) with the all-*trans*, 9-*cis* and 11-*cis* isomers of retinal were embedded in a membrane using the CHARMM-GUI website. These systems were minimized, heated and then long time-scale dynamics were performed for 380 ns using the AMBER ff14SB and lipid14 forcefields along with our derived retinal chromophore parameters.<sup>15</sup> The restraints used in each step are outline in Table S1. Each structure was first minimized using the classical force field for 100,000 steps. During the minimization step a restraint weight of 10 kcal/mol·Å<sup>2</sup> was placed on all heavy and light atoms. A thermal equilibration step was then performed by heating the models from 0 to 300 K stepwise over 50 ps using a timestep of 1 fs, followed by constant temperature and volume for the remaining 450 ps. Next, six separate steps of equilibration were performed for 250 ps each at a constant pressure of 1 atm and temperature of 300 K and slowly releasing the constraints on the heavy and light atoms. Following the release of the constraints, a long time-scale classical step was performed for 300 ns at constant pressure and temperature with a 2 fs timestep. Finally, SHAKE was removed from the protein and an additional 80 ns equilibration step was performed with a timestep of 1 fs.

**Table S1.** Constraints (kcal/mol·Å<sup>2</sup>) used during each step of dynamics with Amber.

| Equilibration step        | Protein | Lipid | Ions |
|---------------------------|---------|-------|------|
| NVT (500 ps)              | 10.0    | 5.0   | 10.0 |
| NPT 1 (250 ps)            | 10.0    | 5.0   | 10.0 |
| NPT 2 (250 ps)            | 5.0     | 2.5   | 0.0  |
| NPT 3 (250 ps)            | 2.5     | 1.0   | 0.0  |
| NPT 4 (250 ps)            | 1.0     | 0.5   | 0.0  |
| NPT 5 (250 ps)            | 0.5     | 0.1   | 0.0  |
| NPT 6 (250 ps)            | 0.1     | 0.0   | 0.0  |
| NPT 7 (300 ns)            | 0.0     | 0.0   | 0.0  |
| NPT without SHAKE (80 ns) | 0.0     | 0.0   | 0.0  |

The trajectories were then continued as outlined in the main text to determine the absorption maxima of the three isomers.
